# Supplementary material for: Targeted next-generation sequencing identification of mutations in patients with disorders of sex development
Source: BMC Med Genet. 2016 Mar 15;17:23. doi: 10.1186/s12881-016-0286-2 (PMC4791760; doi:10.1186/s12881-016-0286-2)
Supplement: Additional file 1: — Genes associated with disorders of sex development (DSD). (XLSX 25 kb) [file 12881_2016_286_MOESM1_ESM.xlsx]

## Sheet: Additional file 1
Additional file 1 Genes associated with disorders of sex development(DSD)
Gene	Phenotype MIM number	Disease name	Sex chromosome dosage
AGPAT2	608594	congenital generalized lipodystrophy type 1	-
AIRE	240300	Autoimmune polyendocrinopathy syndrome type I, with or without reversible metaphyseal dysplasia	-
AKR1C2	614279	46XY sex reversal 8(SRXY8)	-
AKR1C4	614279	46XY sex reversal 8, modifier of	-
ALMS1	203800	Alstrom syndrome	-
ALX4	613451	Frontonasal dysplasia 2	-
AMH	261550	Persistent Mullerian duct syndrome type I（PMDS）	-
AMHR2	261550	Persistent Mullerian duct syndrome type II（PMDS）	-
AR	300633	X-linked isolated hypospadias-1 (HYSP1)	Yes,chrX
AR	300068	Androgen insensitivity syndrome	Yes,chrX
ARID1B	614562	Autosomal dominant mental retardation-12	-
ARL6	209900	Bardet-Biedl syndrome 3	-
ARX	300004	Proud syndrome	Yes,chrX
ARX	300215	X-linked lissencephaly with ambiguous genitalia	Yes,chrX
ATR	210600	Seckel syndrome 1	-
ATRX	309580	X-linked Mental retardation-hypotonic facies syndrome	Yes,chrX
ATRX	301040	X-linked Alpha-thalassemia/mental retardation syndrome	Yes,chrX
BBS1	209900	Bardet-Biedl syndrome 1	-
BBS10	209900	Bardet-Biedl syndrome 10	-
BBS12	209900	Bardet-Biedl syndrome 12	-
BBS2	209900	Bardet-Biedl syndrome 2	-
BBS4	209900	Bardet-Biedl syndrome 4	-
BBS5	209900	Bardet-Biedl syndrome 5	-
BBS7	209900	Bardet-Biedl syndrome 7	-
BBS9	209900	Bardet-Biedl syndrome 9	-
BLM	210900	Bloom syndrome	-
BMP15	300510	Premature ovarian failure 4(POF4)	Yes,chrX
BMP15	300510	Ovarian dysgenesis 2(ODG2)	Yes,chrX
BMP4	607932	Microphthalmia, syndromic 6	-
BMPR1B	609441	Acromesomelic chrondrodysplasia with genital anomalies	-
BRAF	613706	Noonan syndrome 7	-
BRCC3	-	Chromosome Xq28 deletion syndrome, 3.4-KB	Yes,chrX
BRWD3	300659	X-linked mental retardation syndrome 93	Yes,chrX
BSCL2	269700	congenital generalized lipodystrophy type 2	-
BUB1B	257300	Mosaic variegated aneuploidy syndrome 1	-
CBX2	613080	46XY sex reversal 5(SRXY5)	-
CD96	211750	C syndrome	-
CDKN1C	614732	IMAGE syndrome	-
CEP290	209900	Bardet-Biedl syndrome 14	-
CFTR	277180	Congenital bilateral absence of vas deferens	-
CFTR	219700	Cystic fibrosis（CF）	-
CHD7	612370	Hypogonadotropic hypogonadism 5 with or without anosmia	-
CHD7	214800	CHARGE syndrome	-
CHRM3	100100	Eagle-Barrett syndrome	-
CREBBP	180849	Rubinstein-Taybi syndrome	-
CUL4B	300354	X-linked mental retardation syndrome 15 (Cabezas type)	Yes,chrX
CUL7	273750	3-M syndrome 1	-
CYB5A	250790	Methemoglobinemia type IV	-
CYP11A1	613743	Congenital adrenal insufficiency with 46XY sex reversal	-
CYP11B1	202010	Congenital adrenal hyperplasia due to 11-beta-hydroxylase deficiency	-
CYP17A1	202110	17-alpha-hydroxylase/17,20-lyase deficiency	-
CYP19A1	613546	Aromatase deficiency	-
DCAF17	241080	Woodhouse-Sakati syndrome	-
DDX3Y	-	-	Yes,chrY
DGKK	-	-	Yes,chrX
DHCR7	270400	Smith-Lemli-Opitz syndrome	-
DHH	233420	46XY sex reversal 7(SRXY7)	-
DHH	607080	46XY partial gonadal dysgenesis with minifascicular neuropathy	-
DIAPH2	-	-	Yes,chrX
DMRT1	154230	46XX sex reversal 4/Chromosome 9p24.3 deletion syndrome	-
DMRT2	154230	46XX sex reversal 4/Chromosome 9p24.3 deletion syndrome	-
DMRT3	154230	46XX sex reversal 4/Chromosome 9p24.3 deletion syndrome	-
DOCK8	154230	46XX sex reversal 4/Chromosome 9p24.3 deletion syndrome	-
EBP	-	-	Yes,chrX
EIF1AY	-	-	Yes,chrY
EIF2B1	603896	Leukoencephalopathy with vanishing white matter/Ovarioleukodystrophy	-
EIF2B2	603896	Leukoencephalopathy with vanishing white matter/Ovarioleukodystrophy	-
EIF2B3	603896	Leukoencephalopathy with vanishing white matter/Ovarioleukodystrophy	-
EIF2B4	603896	Leukoencephalopathy with vanishing white matter/Ovarioleukodystrophy	-
EIF2B5	603896	Leukoencephalopathy with vanishing white matter/Ovarioleukodystrophy	-
ERCC8	216400	Cockayne syndrome A	-
EVC	225500	Ellis-van Creveld syndrome	-
EVC2	225500	Ellis-van Creveld syndrome	-
FGD1	305400	Aarskog-Scott syndrome	Yes,chrX
FGF8	612702	Hypogonadotropic hypogonadism 6 with or without anosmia	-
FGFR1	147950	Hypogonadotropic hypogonadism 2 with or without anosmia	-
FGFR1	166250	Osteoglophonic dysplasia (OGD)	-
FGFR2	101200	Apert syndrome	-
FIGLA	612310	Premature ovarian failure 6(POF6)	-
FLNA	304120	Otopalatodigital syndrome, type II	Yes,chrX
FMR1	300869	Chromosome Xq27.3-q28 duplication syndrome( X:142,100,000 - 155,270,560 )	Yes,chrX
FOXL2	608996	Premature ovarian failure 3(POF3)	-
FRAS1	219000	Fraser syndrome	-
FREM2	219000	Fraser syndrome	-
FSHB	229070	Follicle-stimulating hormone deficiency, isolated	-
FSHR	233300	Ovarian dysgenesis 1(ODG1）	-
GATA1	-	-	Yes,chrX
GATA4	615542	Testicular anomalies with or without congenital heart disease	-
GHR	262500	Laron syndrome	-
GK	307030	Glycerol kinase deficiency	Yes,chrX
GLI3	146510	Pallister-Hall syndrome	-
GNAS	612463	Pseudopseudohypoparathyroidism（PPHP）	-
GNRH1	614841	Hypogonadotropic hypogonadism 12 with or without anosmia	-
GNRHR	146110	Hypogonadotropic hypogonadism 7 with or without anosmia	-
GPC6	258315	Omodysplasia 1	-
H6PD	604931	Cortisone reductase deficiency 1(CORTRD1)	-
HARS2	614926	Perrault syndrome 2(PRLTS2)	-
HCCS	309801	Microphthalmia, syndromic 7	Yes,chrX
HDAC8	309585	Wilson-Turner syndrome	Yes,chrX
HFE	235200	Hemochromatosis type 1(HFE1)	-
HOXA13	140000	hand-foot-genital syndrome (HFG)	-
HOXD13	192350	VACTERL association	-
HPRT1	-	-	Yes,chrX
HS6ST1	614880	Hypogonadotropic hypogonadism 15 with or without anosmia	-
HSD11B1	614662	Cortisone reductase deficiency 2(CORTRD2)	-
HSD17B3	264300	17-beta hydroxysteroid dehydrogenase III deficiency	-
HSD17B4	233400	Perrault syndrome 1(PRLTS1)	-
HSD3B2	201810	3-beta-hydroxysteroid dehydrogenase type II deficiency	-
ICK	612651	Endocrine-cerebroosteodysplasia(ECO)	-
IGSF1	300888	Congenital hypothyroidism and testicular enlargement	Yes,chrX
INPP5E	610156	MORM syndrome	-
INSL3	219050	Cryptorchidism	-
INSR	246200	Donohue syndrome/Leprechaunism	-
INSR	262190	Rabson-Mendenhall syndrome	-
IRF6	119500	Popliteal pterygium syndrome 1	-
IRX5	611174	Hamamy syndrome	-
KAL1	308700	Hypogonadotropic hypogonadism 1 with or without anosmia	Yes,chrX
KDM5C	300534	X-linked mental retardation syndrome （Claes-Jensen type）	Yes,chrX
KDM5D	-	-	Yes,chrY
KIF7	200990	Acrocallosal syndrome	-
KISS1	614842	Hypogonadotropic hypogonadism 13 with or without anosmia	-
KISS1R	614837	Hypogonadotropic hypogonadism 8 with or without anosmia	-
KISS1R	176400	central precocious puberty-1(CPPB1)	-
KLHL4	-	-	Yes,chrX
KRAS	609942	Noonan syndrome 3	-
LEP	614962	Obesity, morbid, due to leptin deficiency	-
LEPR	614963	Obesity, morbid, due to leptin receptor deficiency	-
LHB	N/A	Male pseudohermaphroditism due to defective LH	-
LHCGR	238320	Leydig cell hypoplasia, TypeI	-
LHCGR	176410	Male-limited precocious puberty	-
LMNA	212112	Malouf syndrome	-
MAMLD1	300758	X-linked isolated hypospadias-2 (HYSP2)	Yes,chrX
MAP2K1	115150	Noonan syndrome	-
MAP3K1	613762	46XY sex reversal 6(SRXY6)	-
MBTPS2	308205	IFAP syndrome with or without BRESHECK syndrome	Yes,chrX
MECP2	312750	Rett syndrome	Yes,chrX
MED12	305450	Opitz-Kaveggia syndrome	Yes,chrX
MID1	300000	Opitz GBBB syndrome, type I	Yes,chrX
MKKS	209900	Bardet-Biedl syndrome 6	-
MKS1	209900	Bardet-Biedl syndrome 13	-
MKS1	249000	Meckel syndrome 1	-
MLL2	147920	Kabuki syndrome 1	-
MTCP1	-	Chromosome Xq28 deletion syndrome, 3.4-KB	Yes,chrX
MTM1	-	Chromosome Xq27.3-q28 duplication syndrome( X:142,100,000 - 155,270,560 )	Yes,chrX
NAA10	300855	N-terminal acetyltransferase deficiency	Yes,chrX
NBN	251260	Nijmegen breakage syndrome	-
NOBOX	611548	Premature ovarian failure 5(POF5)	-
NOTCH2	102500	Hajdu-Cheney syndrome(HJCYS)	-
NR0B1	300018	46XY sex reversal 2(SRXY2)	Yes,chrX
NR0B1	300200	X-linked congenital adrenal hypoplasia with hypogonadotropic hypogonadism	Yes,chrX
NR3C1	N/A	Cortisol resistance	-
NR5A1	612965	46XY sex reversal 3(SRXY3)	-
NR5A1	612964	Premature ovarian failure 7(POF7)	-
NRAS	613224	Noonan syndrome 6	-
NSDHL	308050	CHILD syndrome	Yes,chrX
NSMF	614838	Hypogonadotropic hypogonadism 9 with or without anosmia	-
OCRL	309000	Lowe syndrome	Yes,chrX
OFD1	300209	Simpson-Golabi-Behmel syndrome type 2	Yes,chrX
OPHN1	300486	X-linked mental retardation, ,with cerebellar hypoplasia and distinctive facial appearance	Yes,chrX
ORC1	224690	Meier-Gorlin syndrome 1	-
PAPSS2	612847	Brachyolmia 4 with mild epiphyseal and metaphyseal changes	-
PAX2	191830	Renal adysplasia/Urogenital adysplasia	-
PAX2	120330	Papillorenal syndrome	-
PCDH11Y	-	-	Yes,chrY
PCSK1	600955	Obesity with impaired prohormone processing	-
PEX1	214100	Peroxisome biogenesis disorder 1A (Zellweger)	-
PEX12	614859	Peroxisome biogenesis disorder 3A (Zellweger)	-
PEX14	614887	Peroxisome biogenesis disorder 13A (Zellweger)	-
PEX2	614866	Peroxisome biogenesis disorder 5A (Zellweger)	-
PEX26	614872	Peroxisome biogenesis disorder 7A (Zellweger)	-
PEX3	614882	Peroxisome biogenesis disorder 10A (Zellweger)	-
PEX5	214110	Peroxisome biogenesis disorder 2A (Zellweger)	-
PEX6	614862	Peroxisome biogenesis disorder 4A (Zellweger)	-
PHF6	301900	Borjeson-Forssman-Lehmann syndrome（BFLS）	Yes,chrX
PITX2	180500	Axenfeld-Rieger syndrome type 1	-
PMM2	212065	Congenital disorder of glycosylation, type Ia	-
POF1B	300604	Premature ovarian failure 2B(POF2B)	Yes,chrX
POLG	157640	Autosomal dominant Progressive external ophthalmoplegia	-
POLR3A	607694	Leukodystrophy with hypomyelinating7	-
POR	613571	Cytochrome P450 oxidoreductase Deficiency	-
POR	201750	Antley-Bixler syndrome with genital anomalies and disordered steroidogenesis	-
PRKAR1A	101800	Acrodysostosis 1, with or without hormone resistance	-
PROK2	610628	Hypogonadotropic hypogonadism 4 with or without anosmia	-
PROKR2	244200	Hypogonadotropic hypogonadism 3 with or without anosmia	-
PSMC3IP	614324	Ovarian dysgenesis 3(ODG3)	-
PTPN11	163950	Noonan syndrome 1	-
RAB23	201000	Carpenter syndrome	-
RAB3GAP2	212720	Martsolf syndrome	-
RAB40AL	300519	X-linked mental retardation syndrome （Martin-Probst type）	-
RAF1	611553	Noonan syndrome 5	-
RECQL4	268400	Rothmund-Thomson syndrome	-
RET	191830	Renal adysplasia/Urogenital adysplasia	-
RIPK4	263650	Popliteal pterygium syndrome 2	-
ROR2	268310	Autosomal recessive robinow syndrome	-
RSPO1	610644	Palmoplantar hyperkeratosis with squamous cell carcinoma of skin and sex reversal	-
RXFP2	219050	Cryptorchidism	-
SEMA3A	614897	Hypogonadotropic hypogonadism 16 with or without anosmia	-
SEMA3E	214800	CHARGE syndrome	-
SF3B4	154400	Acrofacial dysostosis 1, Nager type	-
SLC29A3	602782	Histiocytosis-lymphadenopathy plus syndrome	-
SLC39A4	201100	Acrodermatitis enteropathica（Zinc-Deficiency Type）	-
SMARCA2	154230	46XX sex reversal 4/Chromosome 9p24.3 deletion syndrome	-
SMS	309583	X-linked mental retardation syndrome （Snyder-Robinson type）	Yes,chrX
SOS1	610733	Noonan syndrome 4	-
SOX10	609136	PCWH syndrome	-
SOX2	206900	syndromic microphthalmia-3 (MCOPS3)	-
SOX3	300833	46XX sex reversal 3/Chromosome Xq26 duplication syndrome	Yes,chrX
SOX9	278850	46XX sex reversal 2/Chromosome 17q24 duplication syndrome	-
SOX9	114290	Acampomelic campomelic dysplaia with or without sex reversal	-
SRD5A2	264600	Steroid 5-alpha-reductase deficiency（Pseudovaginal perineoscrotal hypospadias）	-
SRY	400044	46XY sex reversal 1(SRXY1)	Yes,chrY
SRY	400045	46XX sex reversal 1（SRXX1）	-
STAR	201710	Lipoid congenital adrenal hyperplasia(LCAH)	-
STK11	175200	Peutz-Jeghers syndrome	-
STRA6	601186	syndromic microphthalmia-9 (MCOPS9)	-
TAC3	614839	Hypogonadotropic hypogonadism 10 with or without anosmia	-
TACR3	614840	Hypogonadotropic hypogonadism 11 with or without anosmia	-
TBCE	241410	Sanjad-Sakati Syndrome	-
TBX3	181450	Ulnar-mammary syndrome	-
TMEM67	209900	Bardet-Biedl syndrome 14, modifier of	-
TP63	604292	Ectrodactyly, ectodermal dysplasia, and cleft lip/palate syndrome 3（EEC syndrome-3）	-
TRIM32	209900	Bardet-Biedl syndrome 11	-
TSHR	275200	congenital nongoitrous hypothyroidism-1 (CHNG1)	-
TSPYL1	608800	Sudden infant death with dysgenesis of the testes syndrome	-
TTC8	209900	Bardet-Biedl syndrome 8	-
UBR1	243800	Johanson-Blizzard syndrome	-
UPK3A	191830	Renal adysplasia/Urogenital adysplasia	-
USP26	-	-	Yes,chrX
USP9Y	-	-	Yes,chrY
WDPCP	209900	Bardet-Biedl syndrome 15	-
WDR11	614858	Hypogonadtropic hypogonadism 14 with or without anosmia	-
WNT3	273395	Autosomal recessive Tetra-amelia syndrome	-
WNT4	611812	SERKAL syndrome	-
WNT4	158330	Mullerian aplasia and hyperandrogenism	-
WNT5A	180700	Autosomal dominant robinow syndrome	-
WNT7A	276820	Al-Awadi/Raas-Rothschild/Schinzel phocomelia syndrome	-
WT1	194080	Denys-Drash syndrome	-
WT1	136680	Frasier syndrome	-
WT1	608978	Meacham syndrome	-
ZBTB16	612447	Skeletal defects, genital hypoplasia, and mental retardation	-
